# Supplementary material for: The association between blood pressure variability (BPV) with dementia and cognitive function: a systematic review and meta-analysis protocol
Source: Springer Nature journal article supplement (doi:10.1186/s13643-018-0811-9), 2018-10-15
Supplement: MOESM2 [file 16200314]

## Additional file 2 Search String

### MEDLINE

“blood pressure variability” OR “visit-to-visit” OR “ambulatory blood pressure monitoring” OR “24-hour blood pressure monitoring” OR “home blood pressure monitoring” AND “dementia” OR “Alzheimer’s disease” OR “vascular dementia” OR “cognitive impairment” OR “Mini Mental State” OR “cognitive function” OR “cognitive testing” OR “neuropsychological testing” OR “memory”.
